# Supplementary material for: Estimation of serum C-reactive protein activity in periodontal health and disease and response to treatment: a clinico-biochemical study
Source: PeerJ. 2023 Dec 4;11:e16495. doi: 10.7717/peerj.16495 (PMC10702329; doi:10.7717/peerj.16495)
Supplement: Data S1 [file peerj-11-16495-s001.xlsx]

## Sheet: Sheet1
Group	Time	CRP (mg/L	PI	GI	PPD	RI
1	Baseline	1.3	0.53	0.35	N/A	N/A
1	Baseline	0.7	0.57	0.39	N/A	N/A
1	Baseline	0.7	0.46	0.35	N/A	N/A
1	Baseline	0.4	0.55	0.37	N/A	N/A
1	Baseline	3.2	0.46	0.25	N/A	N/A
1	Baseline	0.9	0.46	0.12	N/A	N/A
1	Baseline	1.1	0.32	0.2	N/A	N/A
1	Baseline	0.7	0.25	0.17	N/A	N/A
1	Baseline	0.5	0.33	0.2	N/A	N/A
1	Baseline	0.8	0.12	0.13	N/A	N/A
1	Baseline	0.2	0.53	0.17	N/A	N/A
1	Baseline	0.6	0.41	0.24	N/A	N/A
1	Baseline	0.6	0.37	0.27	N/A	N/A
1	Baseline	0.5	0.32	0.24	N/A	N/A
1	Baseline	0.2	0.25	0.16	N/A	N/A
1	Baseline	0.1	0.48	0.24	N/A	N/A
1	Baseline	0.8	0.19	0.14	N/A	N/A
1	Baseline	0.7	0.23	0.11	N/A	N/A
1	Baseline	0.6	0.46	0.23	N/A	N/A
1	Baseline	0.9	0.16	0.1	N/A	N/A
1	Baseline	0.7	0.53	0.24	N/A	N/A
1	Baseline	0.5	0.21	0.22	N/A	N/A
1	Baseline	0.6	0.23	0.16	N/A	N/A
1	Baseline	0.2	0.3	0.12	N/A	N/A
1	Baseline	0.5	0.39	0.16	N/A	N/A
1	Baseline	0.7	0.55	0.3	N/A	N/A
1	Baseline	0.4	0.32	0.25	N/A	N/A
1	Baseline	0.3	0.26	0.16	N/A	N/A
1	Baseline	0.5	0.32	0.24	N/A	N/A
1	Baseline	0.2	0.25	0.24	N/A	N/A
2	Baseline	1.9	2.3	2.03	6.14	4
2	Baseline	1.8	2.28	2	5.75	3
2	Baseline	1.5	2.03	1.97	5.42	3.28
2	Baseline	2.6	2.27	2.21	6.5	4.29
2	Baseline	1.9	2.86	2.74	5.74	4.15
2	Baseline	2.3	2.07	2.16	6.16	3.14
2	Baseline	2.1	2.19	2.26	5.61	3.85
2	Baseline	1.7	2.13	2.05	5.55	3.07
2	Baseline	2.5	2.29	2.04	5.48	4.14
2	Baseline	2.6	2.07	2	5.52	4.07
2	Baseline	2.9	2.82	1.97	5.3	4.52
2	Baseline	2.7	2.34	1.99	6.08	4.83
2	Baseline	2.6	2.34	2.14	5.7	5.53
2	Baseline	2.1	2.44	2.13	4.96	7.12
2	Baseline	2	2.46	2.14	5.35	3.48
2	Baseline	2.4	2.52	2.41	5.54	6
2	Baseline	1.7	1.75	1.85	5.23	2.71
2	Baseline	2.5	2.31	2.02	6.88	6.25
2	Baseline	4.2	2.22	2.09	6.52	7.09
2	Baseline	3.3	2.12	2.01	5.89	5.87
2	Baseline	3.7	1.91	2	6.35	3.78
2	Baseline	1.9	2.56	2.13	5.23	5.23
2	Baseline	2.3	2.22	2	5.83	5.33
2	Baseline	1.8	1.83	2.02	5.25	4
2	Baseline	2.1	2.28	2.04	5.61	4.08
2	Baseline	2.9	2.09	2.02	5.34	4.92
2	Baseline	2.8	2.03	2.13	5.29	3.92
2	Baseline	1.2	2.23	2.01	5.03	4.14
2	Baseline	2.1	2.29	2.13	4.96	6.56
2	After Treatment	2.2	2.58	2.26	5.06	6.14
2	After Treatment	1.9	2.3	2.03	6.14	4
2	After Treatment	1.8	2.28	2	5.75	3
2	After Treatment	1.5	2.03	1.97	5.42	3.28
2	After Treatment	2.6	2.27	2.21	6.5	4.29
2	After Treatment	1.9	2.86	2.74	5.74	4.15
2	After Treatment	2.3	2.07	2.16	6.16	3.14
2	After Treatment	2.1	2.19	2.26	5.61	3.85
2	After Treatment	1.7	2.13	2.05	5.55	3.07
2	After Treatment	2.5	2.29	2.04	5.48	4.14
2	After Treatment	2.6	2.07	2	5.52	4.07
2	After Treatment	2.9	2.82	1.97	5.3	4.52
2	After Treatment	2.7	2.34	1.99	6.08	4.83
2	After Treatment	2.6	2.34	2.14	5.7	5.53
2	After Treatment	2.1	2.44	2.13	4.96	7.12
2	After Treatment	2	2.46	2.14	5.35	3.48
2	After Treatment	2.4	2.52	2.41	5.54	6
2	After Treatment	1.7	1.75	1.85	5.23	2.71
2	After Treatment	2.5	2.31	2.02	6.88	6.25
2	After Treatment	4.2	2.22	2.09	6.52	7.09
2	After Treatment	3.3	2.12	2.01	5.89	5.87
2	After Treatment	3.7	1.91	2	6.35	3.78
2	After Treatment	1.9	2.56	2.13	5.23	5.23
2	After Treatment	2.3	2.22	2	5.83	5.33
2	After Treatment	1.8	1.83	2.02	5.25	4
2	After Treatment	2.1	2.28	2.04	5.61	4.08
2	After Treatment	2.9	2.09	2.02	5.34	4.92
2	After Treatment	2.8	2.03	2.13	5.29	3.92
2	After Treatment	1.2	2.23	2.01	5.03	4.14
2	After Treatment	2.1	2.29	2.13	4.96	6.56
2	After Treatment	2.2	2.58	2.26	5.06	6.14
